# Supplementary material for: Camptothecin resistance is determined by the regulation of topoisomerase I degradation mediated by ubiquitin proteasome pathway
Source: PubMed Central journal article supplement (PMC5546437; doi:10.18632/oncotarget.16376), 2017-03-18
Supplement: oncotarget-08-43733-s001.pdf [file oncotarget-08-43733-s001.pdf]

## Camptothecin resistance is determined by the regulation of topoisomerase I degradation mediated by ubiquitin proteasome pathway

### Supplementary Material

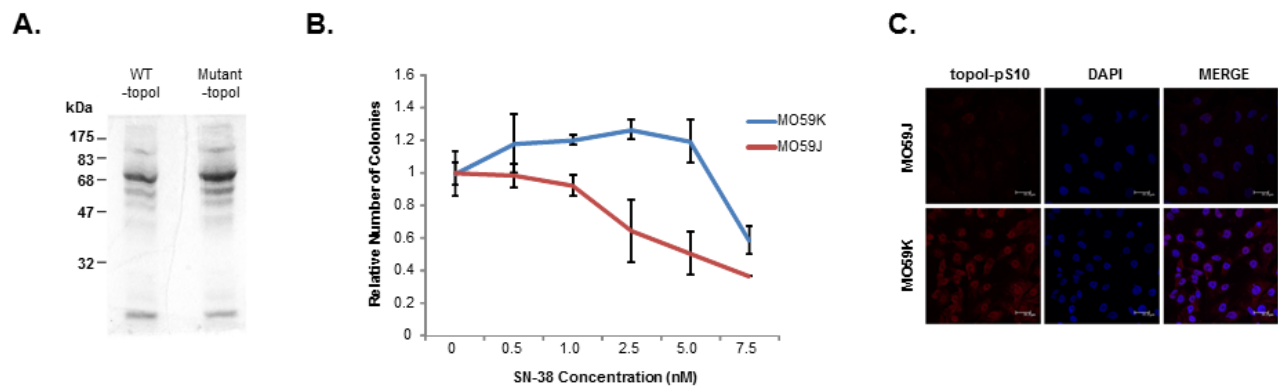

#### Supplementary Figure S1. Related to Figure 1 and 2

**A.** Loading control in wild type topol and mutant topol related to Figure 1F. **B.** Clonogenic assay in MO59K and MO59J cells. MO59K cell has normal level of DNA-PKcs and MO59J cell is DNA-PKcs deficient cells. Cells were treated with indicated concentration of SN-38 for 24 hours. **C.** Topol-pS10 level in MO59J and MO59K cells.

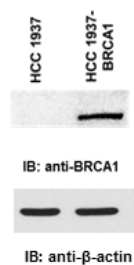

#### Figure S2. Related to Figure 3

Establishment of stably expressed BRCA1 in HCC1937 cell BRCA1-WT was stably expressed in HCC1937 (BRCA1 deletion mutant cells), referred to as HCC1937-BRCA1. HCC1937 and HCC1937-BRCA1 cells were lysed and cell lysates were analyzed by immunoblot with anti-BRCA1 and anti-β-actin.

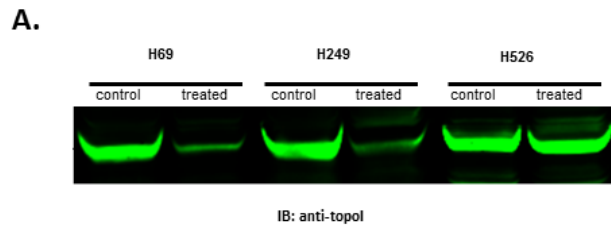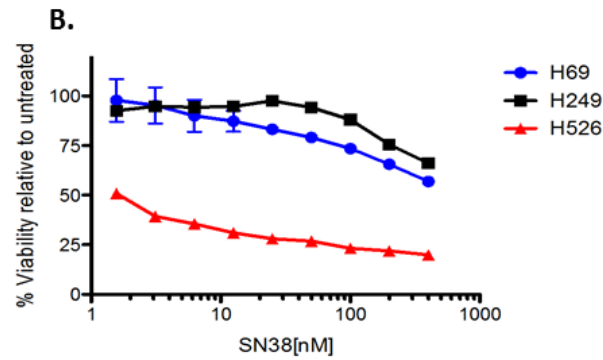

**Figure S3. Related to Figure 4**

**C.** SCLC cell lines H69, H249, and H526 were treated with 1  $\mu$ M SN-38 for 3 hours, and cell lysates from control and treated cells were immunoblotted with anti-topo I antibody. **D.** Cell survival in the presence of various concentrations of SN-38 was determined by MTT after 72 hours treatment.

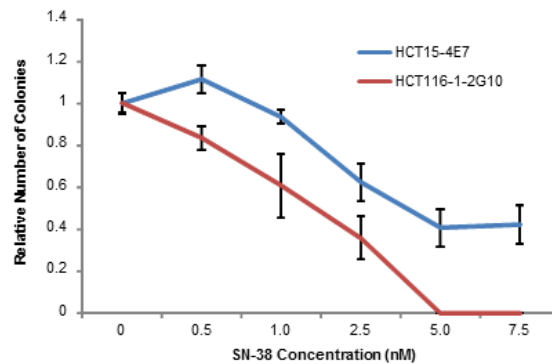

**Figure S4. Related to Figure 5**

Clonogenic assay in genetically engineered HCT15-4E7 cells and HCT116-1-2G10 cells. HCT15 is a resistant cell line to CPT and HCT116 is a sensitive cell line to CPT. Cells were treated with various SN-38 as indicated for 24 hours.

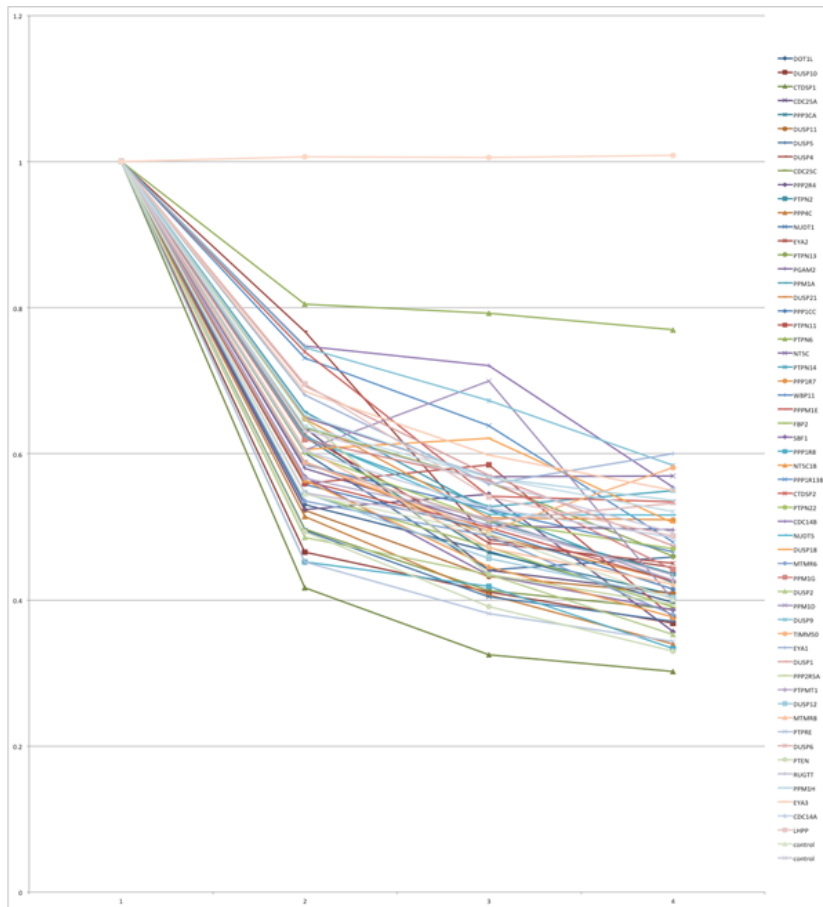

**Figure S5. Related to Figure 6**  
 siRNA library screening for 56 nuclear phosphatases. 56 nuclear phosphatases were silenced using siRNA library in HCT15-4E7 cells. Then the cells were treated with 2.5mM SN-38. After certain time points (2, 4, 6hours), the GFP fluorescence intensity was quantitatively analyzed by plate reader.

**A.**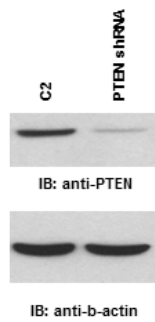**B.**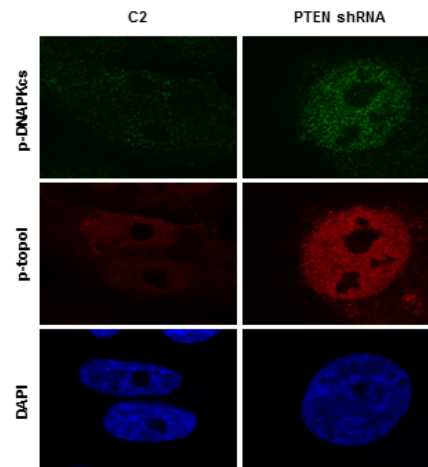**Figure S6. Related to Figure 6**

**A.** Stably PTEN silenced MDA-MB231 (PTEN shRNA) and control cells with WT-PTEN (C2) were lysed and the cell lysates were analyzed by immunoblot analysis with anti-PTEN and anti- $\beta$ -actin antibodies. **B.** C2 and PTEN<sup>-/-</sup> cells were fixed in 3.7% formaldehyde. Followed by cell permeabilization the cells were incubated with anti-p-DNA-PKcs and anti-p-Topo antibody (1:100). Then incubated with 0.1% DAPI. Cells were visualized by Leica S5 confocal microscope.

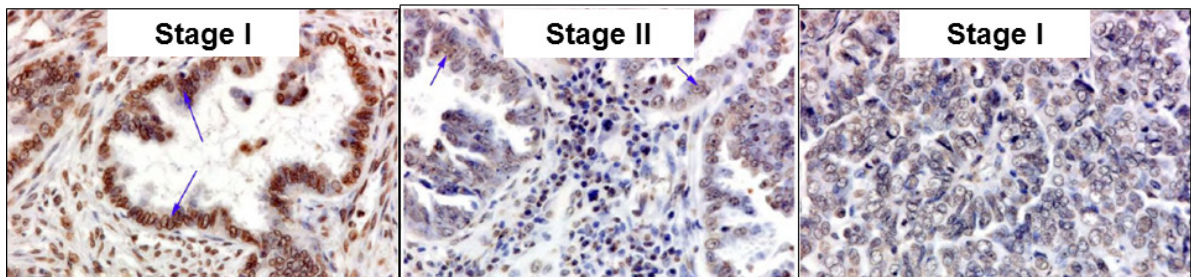**Figure S7:**

Ovarian carcinoma tissue micro-array obtained from USBiomax (BC111109) was stained with anti-topo-pS10. Representative tissue: two stage I carcinoma and one stage II carcinoma, are shown. Blue arrows indicate nuclear labelling in cancer cells.
